# Supplementary material for: Molecular evaluation of five different isolation methods for extracellular vesicles reveals different clinical applicability and subcellular origin
Source: PubMed Central journal article supplement (PMC8298890; doi:10.1002/jev2.12128), 2021-07-22

# Supplemental figure 3

A

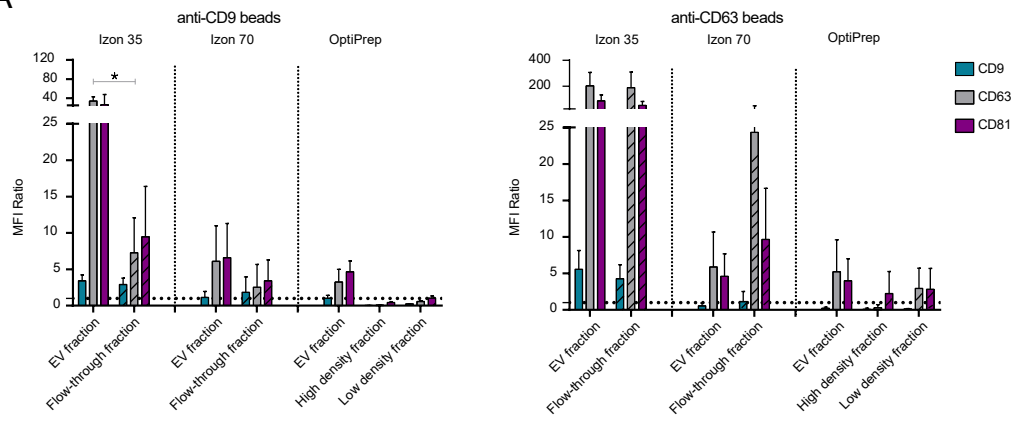

B

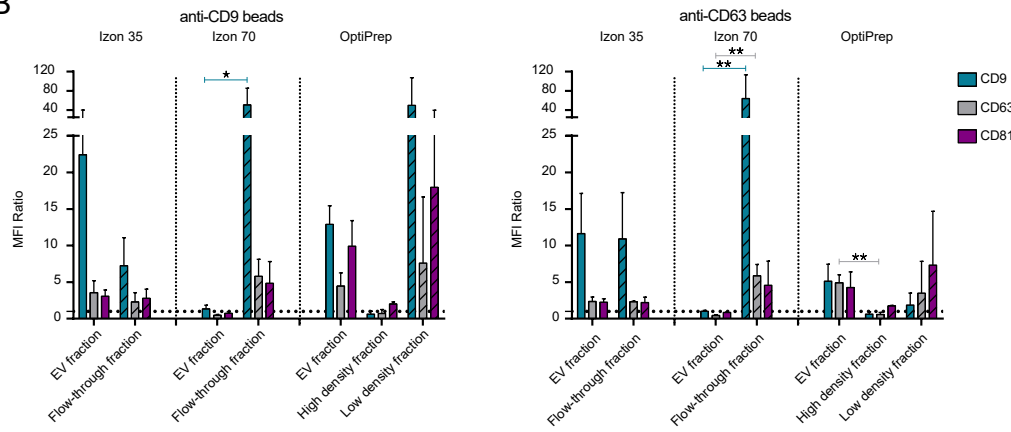

Supplement: JEV2-10-e12128-s006.pdf [file JEV2-10-e12128-s006.pdf]
