# Supplementary material for: Molecular evaluation of five different isolation methods for extracellular vesicles reveals different clinical applicability and subcellular origin
Source: PubMed Central journal article supplement (PMC8298890; doi:10.1002/jev2.12128), 2021-07-22

# Supplementary figure 2

**A**

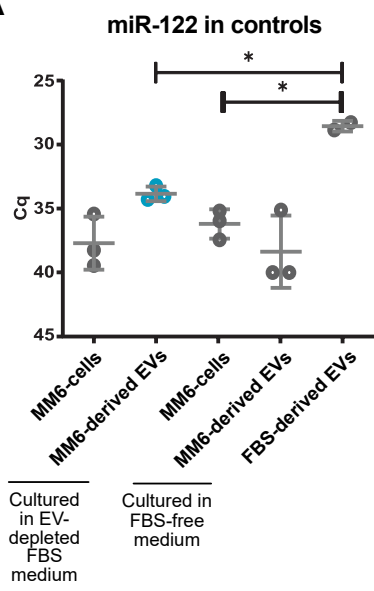

**B**

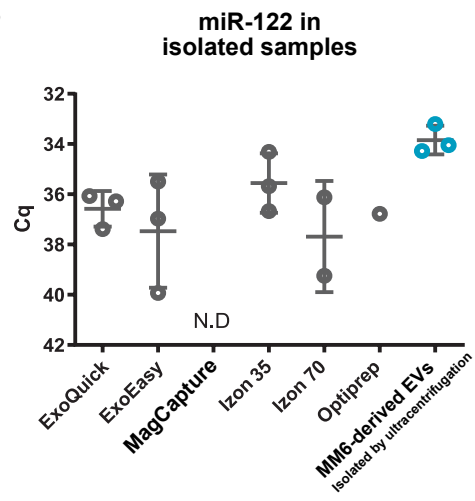

Supplement: JEV2-10-e12128-s007.pdf [file JEV2-10-e12128-s007.pdf]
