# Supplementary material for: Molecular evaluation of five different isolation methods for extracellular vesicles reveals different clinical applicability and subcellular origin
Source: PubMed Central journal article supplement (PMC8298890; doi:10.1002/jev2.12128), 2021-07-22

# Supplementary figure 1

**A**

**Izon 35**

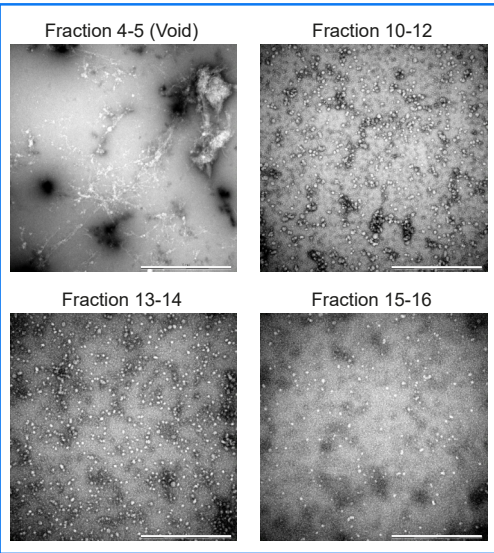

**Izon 70**

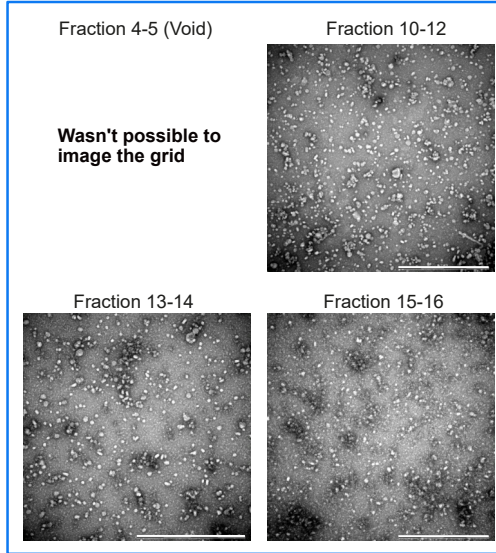

**OptiPrep -  
LD fraction**

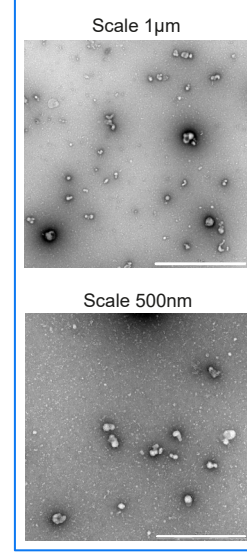

**OptiPrep -  
HD fraction**

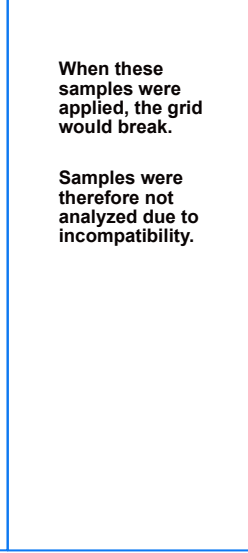

**B**

**Izon 35**

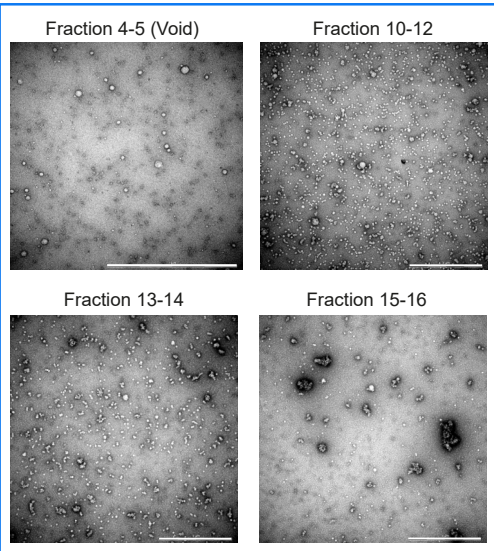

**Izon 70**

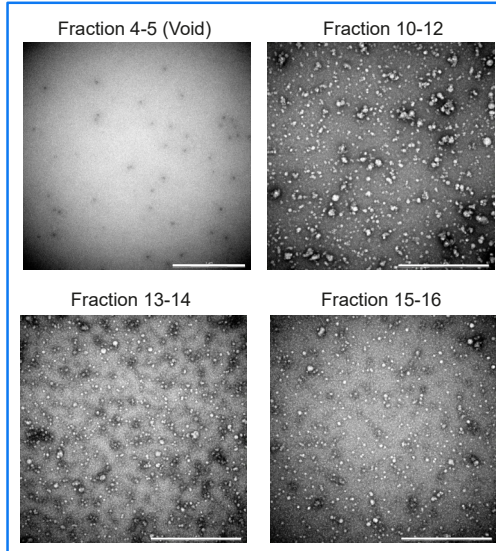

**OptiPrep -  
LD fraction**

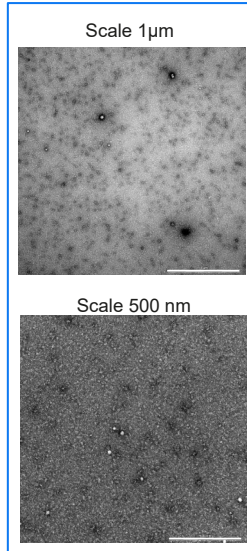

**OptiPrep -  
HD fraction**

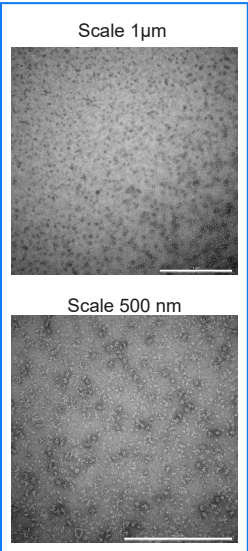

**C**

**FBS-free  
conditioned medium  
Izon 70**

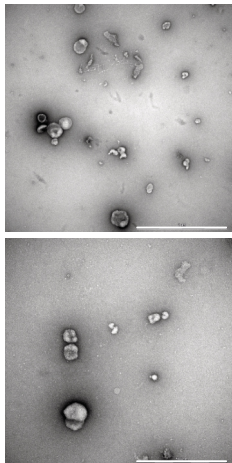

**non-conditioned  
medium  
Izon 70**

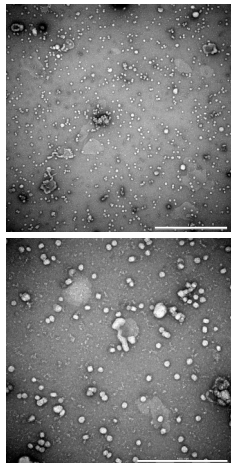

**non-conditioned  
medium**

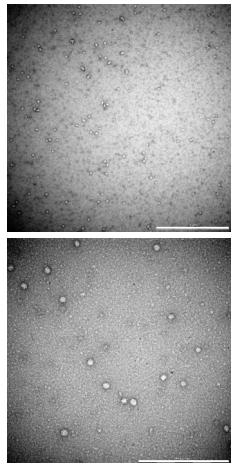

Supplement: JEV2-10-e12128-s008.pdf [file JEV2-10-e12128-s008.pdf]
